# Supplementary material for: Chemical Composition, Structure, and Physical Properties of AlN Films Produced via Pulsed DC Reactive Magnetron Sputtering
Source: MDPI journal article supplement (doi:10.3390/coatings13071281), 2023-07-21
Supplement: s1 [file s1]

Archive with 1 entries (1 files):
- coatings-2493809-supplementary.pdf
